# Supplementary material for: Trichoplein binds PCM1 and controls endothelial cell function by regulating autophagy
Source: PubMed Central journal article supplement (PMC7332983; doi:10.15252/embr.201948192), 2020-04-26
Supplement: EMBR-21-e48192-s001.pdf [file EMBR-21-e48192-s001.pdf]

**Appendix for “Trichoplein binds PCM1 and controls endothelial cell function by regulating autophagy”**

**Table of Content**

Appendix Figure S1.....page 2  
Appendix Figure S2.....page 4  
Appendix Figure S3.....page 5  
Appendix Figure S4.....page 6

A

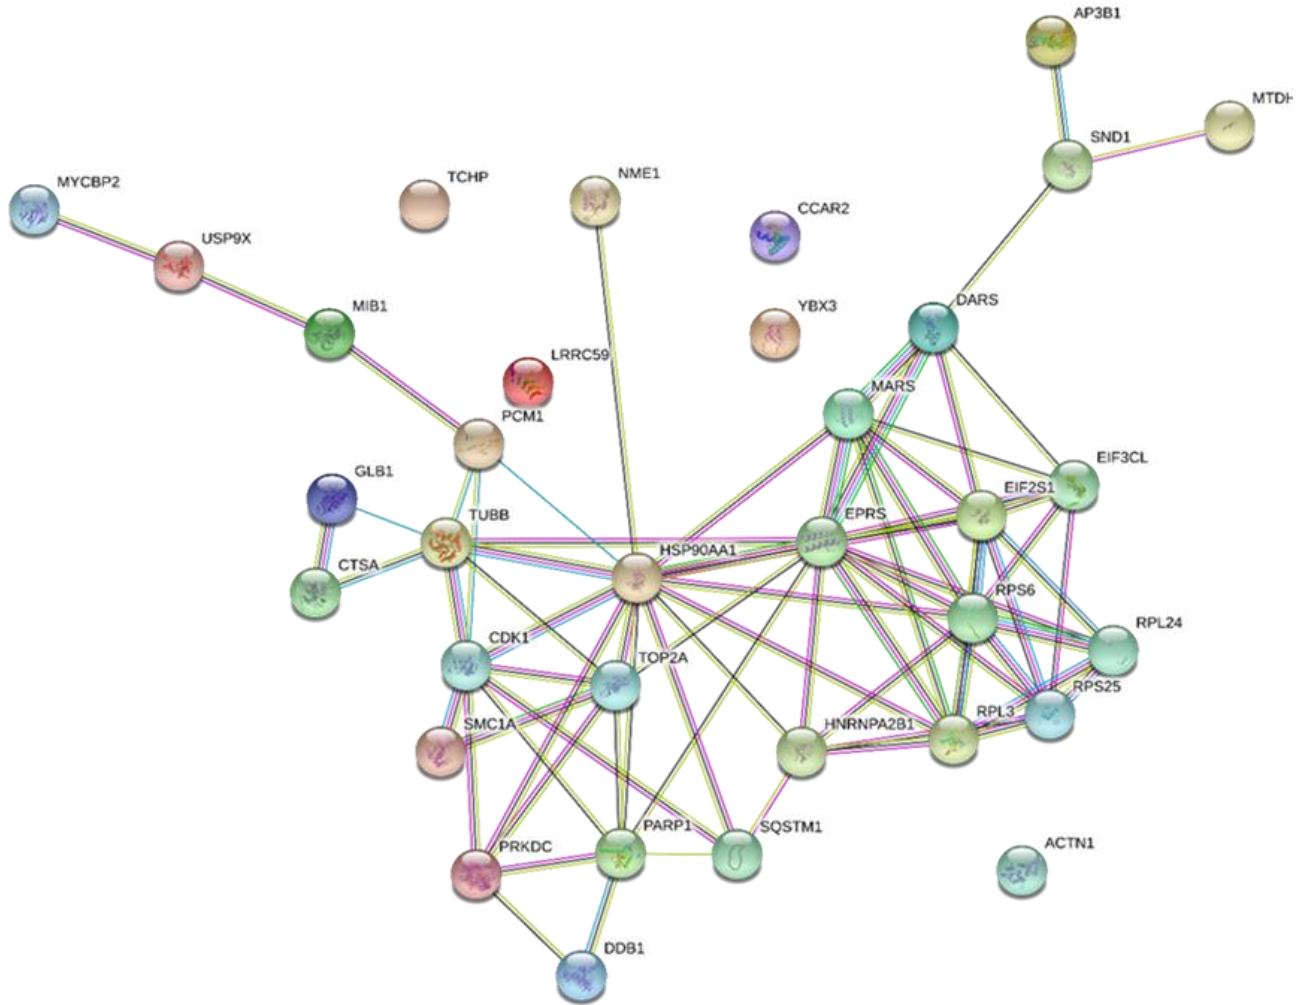

## B

Protein models:

### TCHP $\Delta 1$

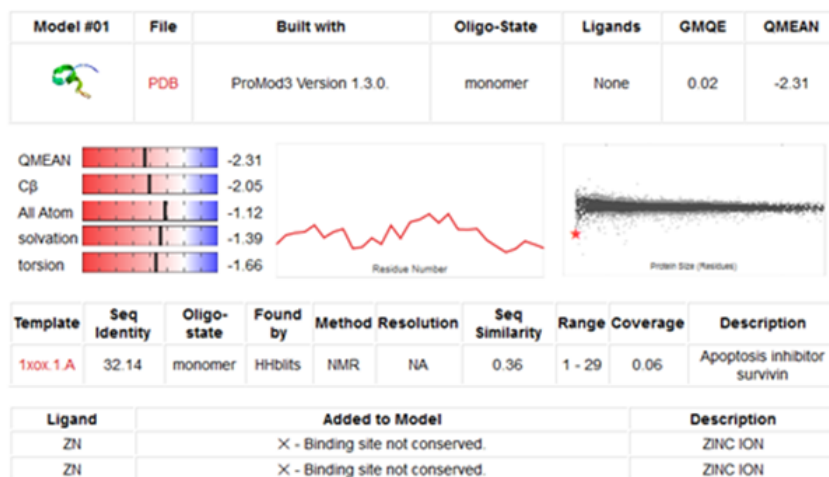

### TCHP $\Delta 1,2$

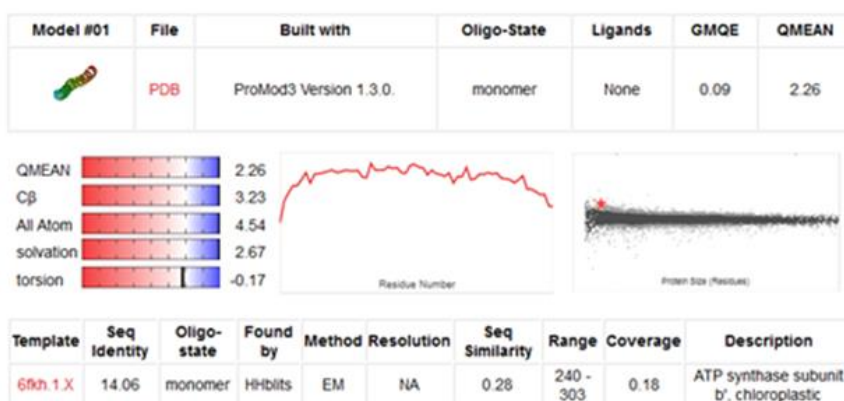

### Appendix Figure S1: Protein network and TCHP mutants analysis

**A**, TCHP protein interaction network analysis using STRING software. **B**, The SWISS-MODEL (<https://swissmodel.expasy.org/>) template library (SMTL version 18-07-2019, PDB release 12-7-2019) was searched with BLAST (Camacho, C et al. 2009) and HHblits (Remmert et al. 2012) for evolutionary related structures matching the target sequence for TCHP  $\Delta 1$  and TCHP  $\Delta 1,2$ . Top-hit homologues protein were Survivin for TCHP  $\Delta 1$  and ATP synthase subunit b for TCHP  $\Delta 1,2$

**A**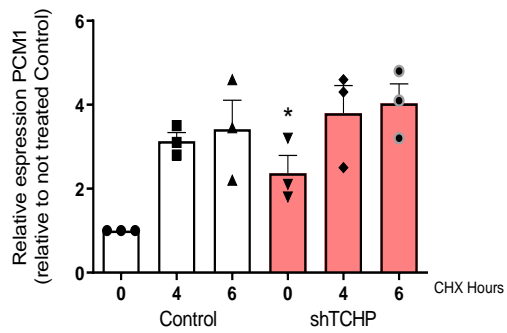**B**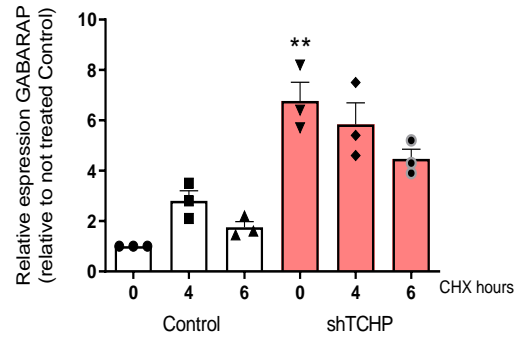**Appendix Figure S2: PCM1 and GABARAP expression**

Expression of **A**, PCM1 and **B**, GABARAP in control or TCHP knock-down HUVECs were subjected to cycloheximide (CHX) for the indicated number of hours (A: one-way ANOVA, \* $p = 0.0325$  vs control 0 hour; B: one-way ANOVA, \*\* $p = 0.0015$  vs control 0 hour).

Data information: statistical analyses were performed on at least three independent experiments. Data are represented as mean  $\pm$  SD.

A

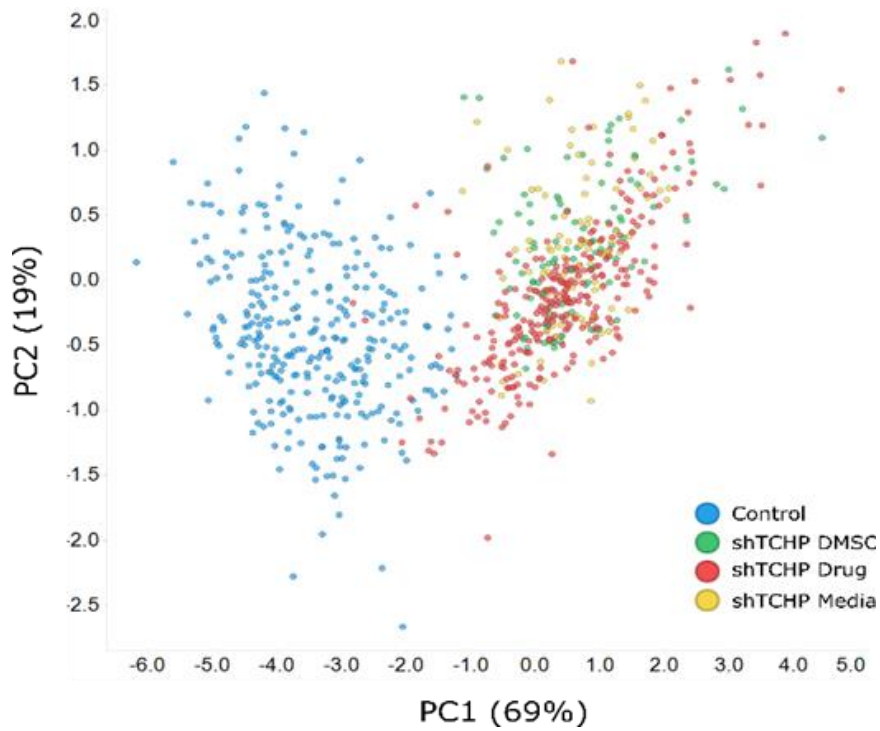

B

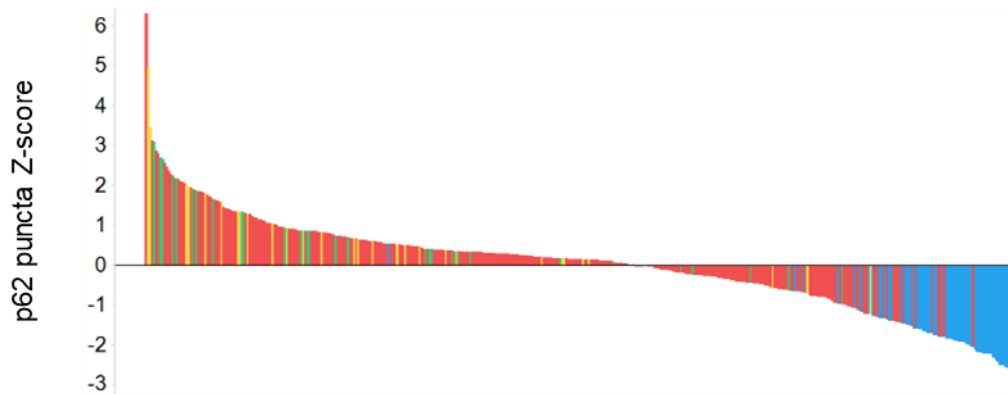

**Appendix Figure S3: Phenotypic screening assay analysis**

**A**, Principal component analysis of compound screen. Principal components (PC) 1 and 2 are shown and their respective variance indicated. **B**, Z-score ranking of cytoplasmic puncta of p62 immunostaining.

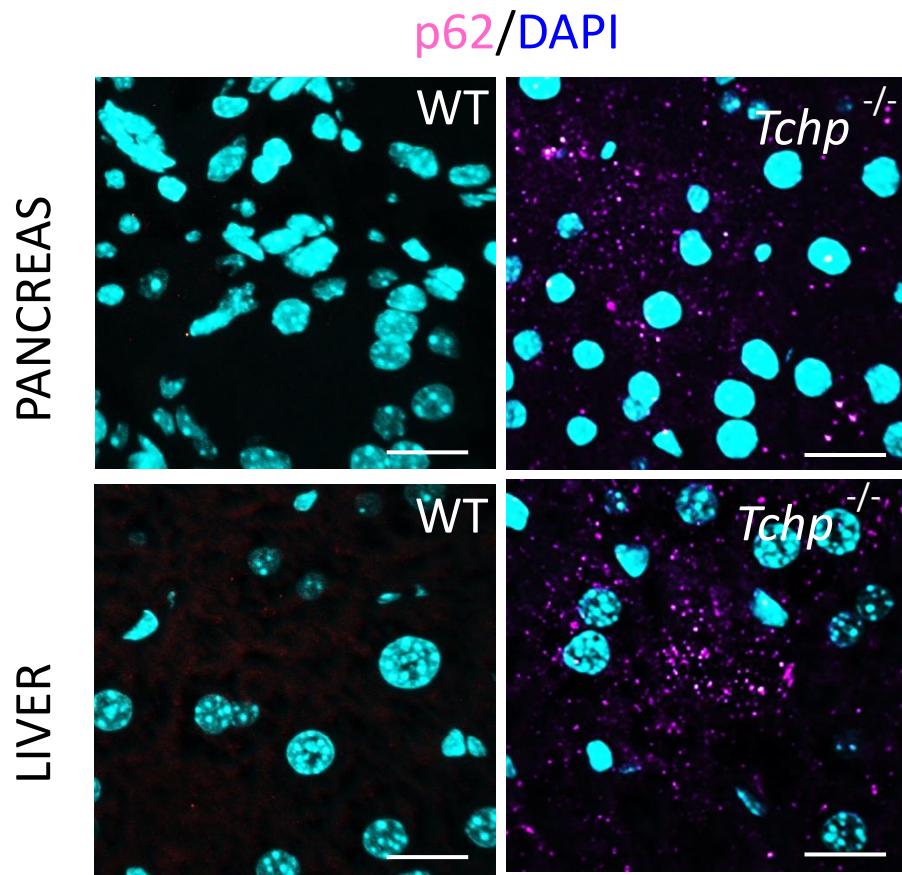

**Appendix Figure S4: Characterization of *Tchp* knock-out mice**

Representative images of the liver and pancreas of wild-type and *Tchp* knock-out mice stained for DAPI (blue) and p62 (red). Scale bars, 50 $\mu$ m.
