# Supplementary material for: Trichoplein binds PCM1 and controls endothelial cell function by regulating autophagy
Source: PubMed Central journal article supplement (PMC7332983; doi:10.15252/embr.201948192), 2020-04-26
Supplement: EMBR-21-e48192-s002.pdf [file EMBR-21-e48192-s002.pdf]

## Expanded View Figures

### Figure EV1. TCHP knock-down affects endothelial cells function.

- A Western blot anti-TCHP following knock-down of TCHP.
- B Endothelial network formation on Matrigel was analysed by quantification of the total length of tube-like structures and number of meshes (unpaired *t*-test,  $**P = 0.0018$  and  $**P = 0.0014$  vs. control, respectively); *right panels*, representative microphotographs from Matrigel assay; scale bars, 100  $\mu\text{m}$ .
- C *Left panels*: representative images are showing the new microvessels positive for CD31 (green), in the implanted plugs. Scale bars, 50 and 25  $\mu\text{m}$  for the inset. *Right panel*: quantification of the area of CD31 coverage in the Matrigel plugs mixed with TCHP siRNA or control oligos at 21 days after implantation; ( $n = 5$  mice per group, unpaired *t*-test,  $**P = 0.0004$  vs. control).
- D Effect of TCHP knock-down on HUVEC migration speed measured by electric cell-substrate impedance sensing (ECIS) (unpaired *t*-test,  $**P = 0.0013$  vs. control).
- E Relative mRNA levels of TCHP and subset of genes. Graphs represent transcripts measured at 3 and 7 days post-TCHP knock-down (unpaired *t*-test vs. control; IL-1 $\beta$ :  $**P = 0.0048$ ; IL-6:  $*P = 0.015$ ; IL-8:  $*P = 0.0365$ —3 days;  $*P = 0.0168$ —7 days; MCP1:  $*P = 0.0223$ ; p16:  $*P = 0.0133$ ; p14:  $**P = 0.0073$ ; TCHP:  $*P = 0.0185$ —3 days;  $*P = 0.0018$ —7 days).
- F Western Blot anti-p16.
- G  $\beta$ -Galactosidase activity as reveal by the chromogenic  $\beta$ -Gal substrate X-Gal. Scale bars 25  $\mu\text{m}$ . Lower panel: quantification (unpaired *t*-test,  $**P < 0.0001$  vs. control).
- H Aggresome staining and quantification of protein aggregates; scale bars, 25  $\mu\text{m}$ . Lower panel: quantification (unpaired *t*-test,  $**P < 0.0001$  vs. control).

Data information: Statistical analyses were performed on at least three independent experiments. Data are represented as mean  $\pm$  SD.

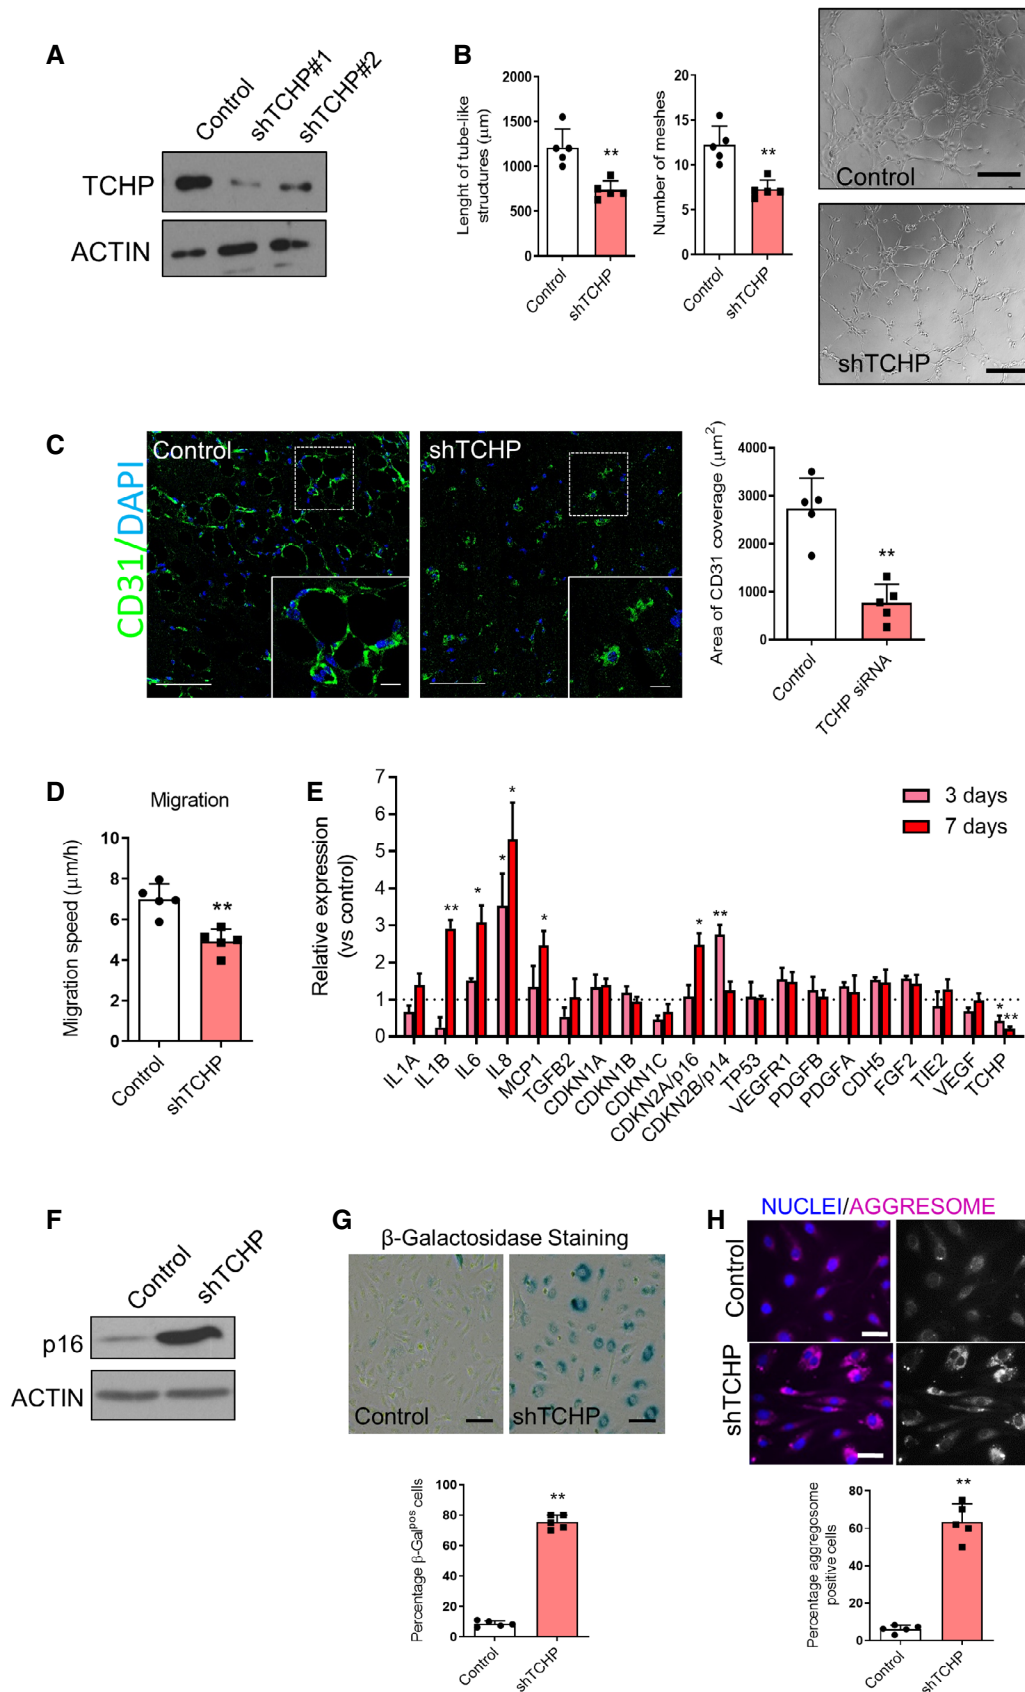

Figure EV1.

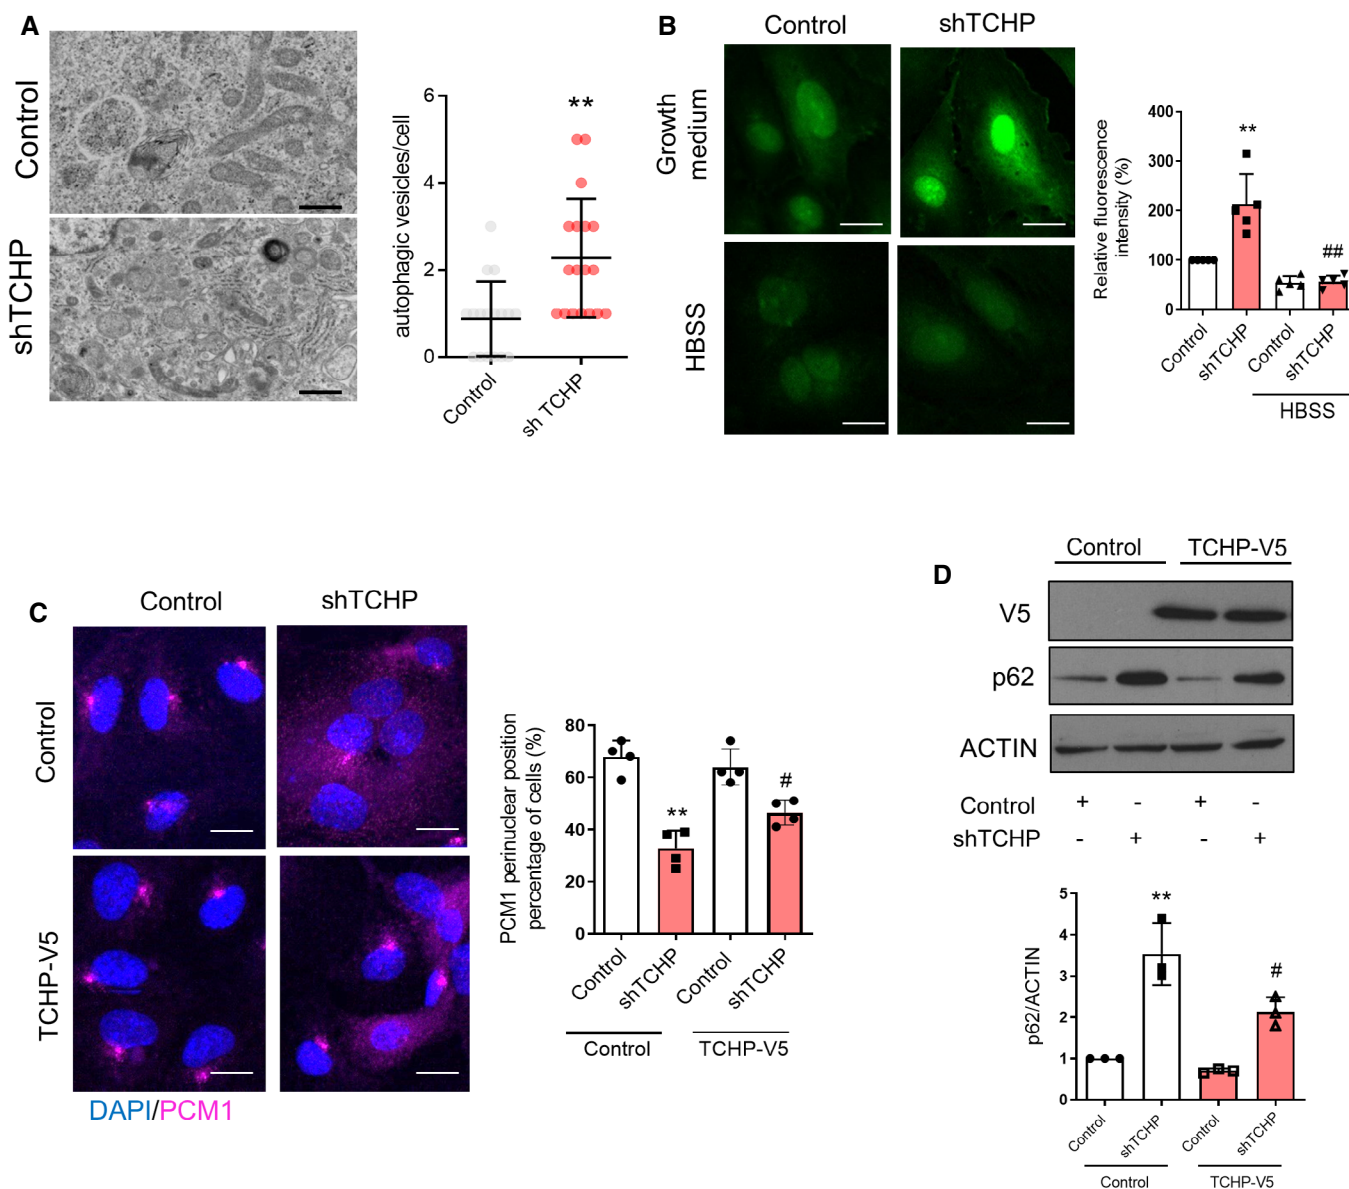

**Figure EV2. Autophagic features in TCHP-depleted endothelial cells.**

A Representative pictures from transmission electron microscopy analysis. Scale bars, 500 nm. Right panel: quantification of autophagic vacuoles ( $n = 16$  cells, unpaired  $t$ -test;  $**P = 0.0010$  vs. control).

B Representative pictures and quantification of HUVECs after Alexa 488 Click-iT<sup>®</sup> L-azidohomoalanine (AHA) labelling. Right panel: quantification ( $n = 50$  cells, one-way ANOVA;  $**P = 0.0037$  vs. control,  $###P = 0.0005$  vs. shTCHP). Scale bars, 25  $\mu$ m.

C TCHP knock-down or control HUVECs were transfected with TCHP-V5 or control vectors and were stained for anti-PCM1 antibody. Panel below: quantification ( $n = 50$  cells; unpaired  $t$ -test;  $**P = 0.0003$  vs. control;  $#P = 0.0166$  vs. shTCHP). Scale bars, 25  $\mu$ m.

D Western blot for anti-V5 and anti-p62 antibody (one-way ANOVA;  $**P = 0.0044$ ;  $#P = 0.0439$  vs. TCHP-V5).

Data information: Statistical analyses were performed on at least three independent experiments. Data are mean  $\pm$  SD.

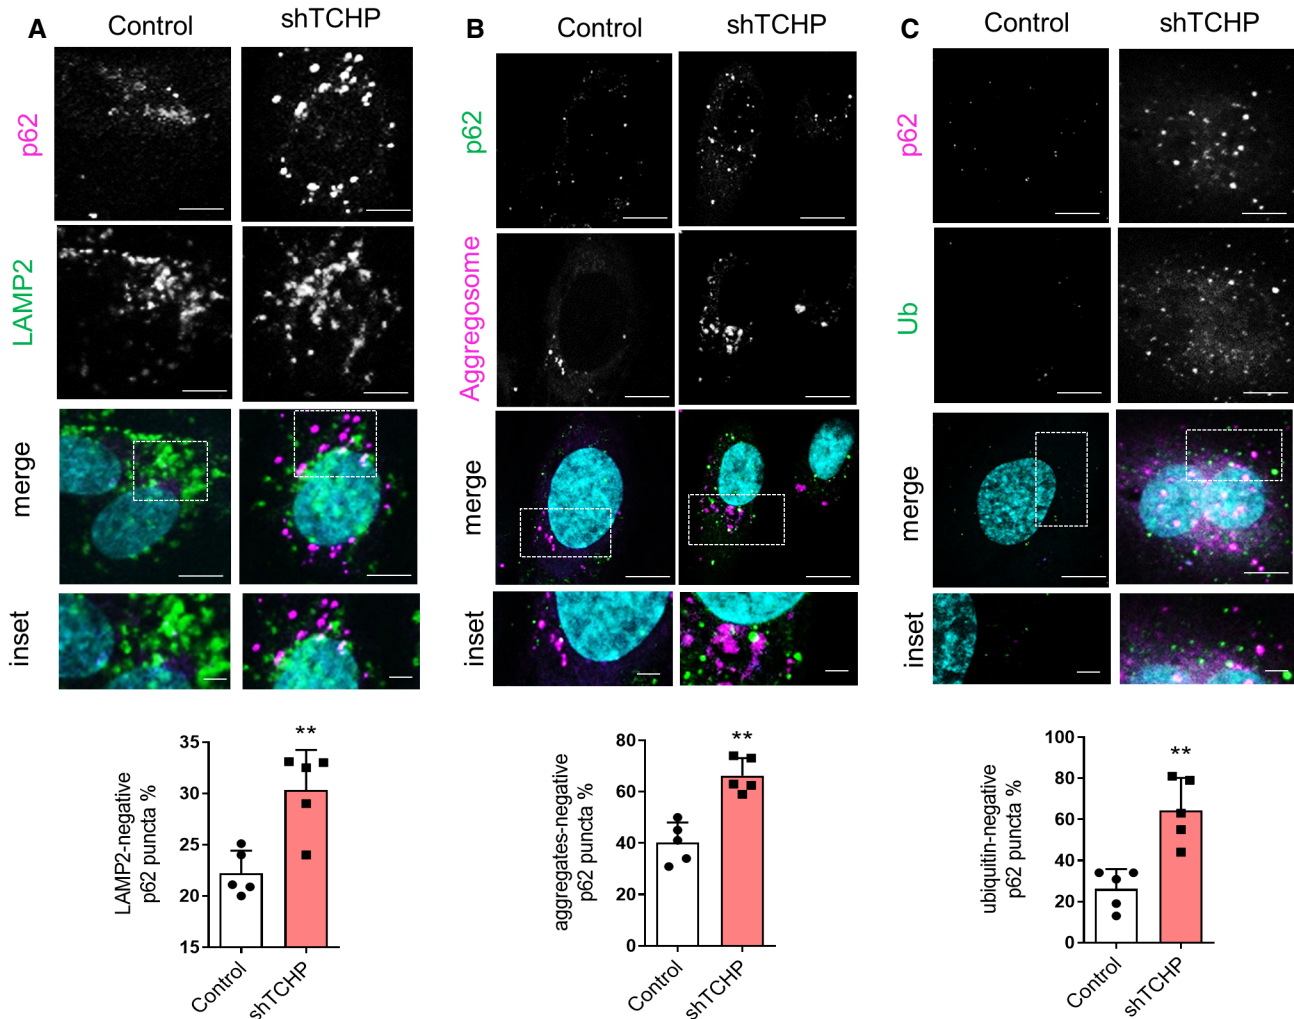

**Figure EV3. Analysis of p62 localization in TCHP knock-down cells.**

A–C Co-localization between (A), LAMP2 and p62, (B), aggregates and p62 and (C), ubiquitinated proteins and p62 in TCHP knock-down and control cells. Scale bars, 25 and 2  $\mu$ m in the inset. Lower panels: quantification of the above panels ( $n = 80$  cells, unpaired-test; A: \*\* $P = 0.0038$  vs. control; B: \*\* $P = 0.0005$  vs. control; C: \*\* $P = 0.0017$  vs. control).

Data information: Statistical analyses were performed on at least three independent experiments. Data are represented as mean  $\pm$  SD.

**Figure EV4. Regulation of lysosomal distribution and activity in TCHP knock-down cells.**

- A Immunofluorescence for recycling (RAB11), early (EEA1), late (RAB7) endosomes and lysosome (LAMP1/2); scale bars, 25  $\mu$ m.
- B Quantitative analysis of LysoTracker Red by flow cytometry (unpaired  $t$ -test; \*\* $P = 0.0007$  vs. control).
- C Representative Western blot showing epidermal growth factor receptor (EGFR) levels during a pulse-chase experiment with EGF (20 nM) for the indicated times. *Right panel*: quantification, ( $n = 3$ , one-way ANOVA; EGF 60 min. \*\* $P = 0.0007$  EGF 90 and 120 min. \*\* $P < 0.0001$  vs. control time 0).
- D Representative images showed TCHP knock-down and control cells stained for LAMP2 and  $\alpha$ Tubulin. Cells were analysed in growing medium (FM), after 2-h starvation (Starv.) or after 2-h starvation and replenishment of growing medium for 2 h (FM/Starv.) Scale bars, 10  $\mu$ m. MT network was quantified as  $\alpha$ -Tubulin intensity. LAMP2 radial integrated fluorescence intensity was used to quantify the distribution of lysosomes. The graph shows the percentage of cells showing cytoplasmic spread or perinuclear lysosome distribution ( $n = 20$  cells, one-way ANOVA; nuclear: \*\* $P = 0.0031$  vs. control FM, \*\* $P = 0.0026$  vs. control FM/Starv. Spread: \* $P = 0.0195$  vs. control FM, \*\* $P = 0.0001$  vs. control FM/Starv) and MT intensity ( $n = 20$  cells, one-way ANOVA; \*\* $P = 0.0056$  vs. control FM).
- E Western blot for anti-p62 in TCHP knock-down and control cells after serum starvation.

Data information: Statistical analyses were performed on at least three independent experiments. Data are represented as mean  $\pm$  SD.

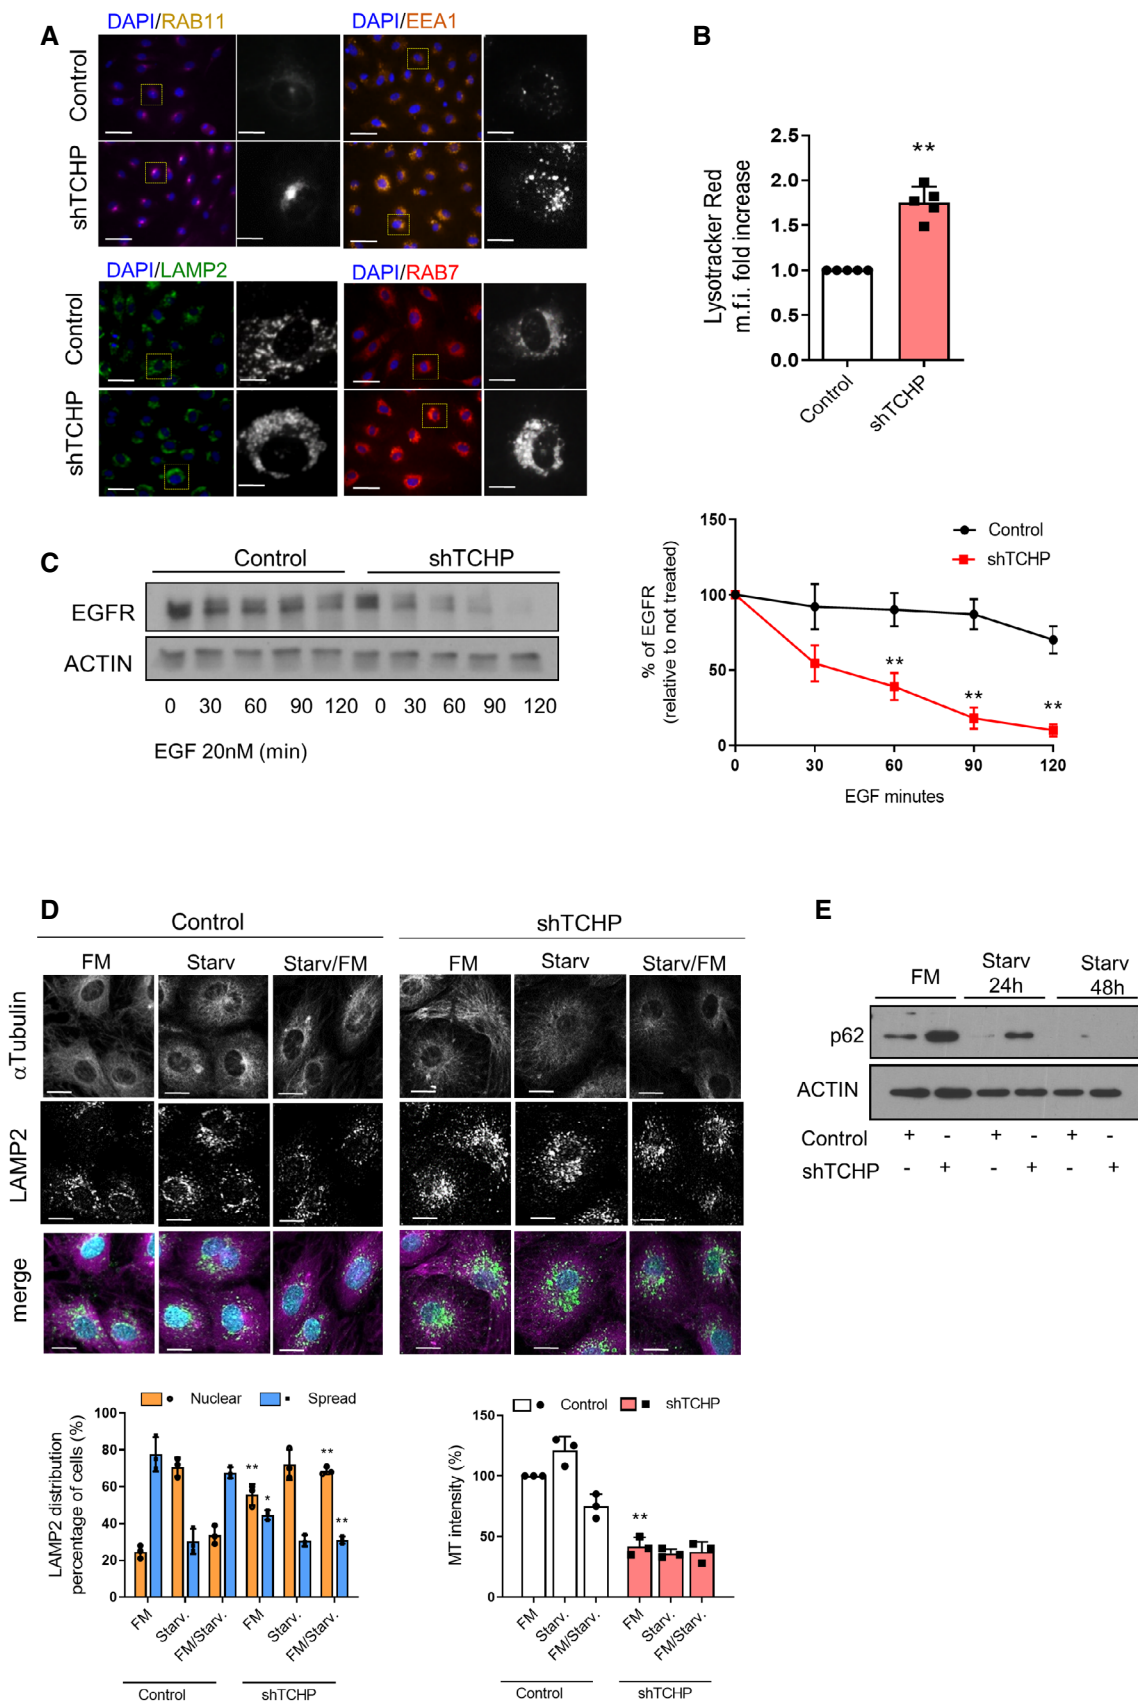

Figure EV4.

**Figure EV5. Identification of the mechanism of p62 accumulation.**

- A Representative images for p62 of control and TCHP knock-down HUVECs treated with BAY11-7082 (300 nM) or TYRPHOSTIN AG1288 (300 nM) or SB202190 (300 nM) or vehicle (DMSO) for 48 h. Scale bars, 50  $\mu$ m.
- B, C (B) Expression of IL-6, IL-8 and IL-1 $\beta$  (one-way ANOVA; IL-8: \*\* $P$  = 0.008 vs. control DMSO; # $P$  = 0.0198 (BAY) # $P$  = 0.01 (AG) vs. shTCHP DMSO; IL-6: \*\* $P$  = 0.0023 vs. control DMSO; # $P$  = 0.0063 (BAY) # $P$  = 0.0108 (AG) vs. shTCHP DMSO; IL-1 $\beta$ : \*\* $P$  = 0.0011 vs. control DMSO; # $P$  = 0.0004 (BAY) # $P$  = 0.0015 (AG) vs. shTCHP DMSO) and (C), migration speed was measured (one-way ANOVA; \*\* $P$  = 0.0003 vs. control DMSO; # $P$  = 0.0451 vs. shTCHP DMSO).
- D Western blot analysis for anti-phosphor-NF- $\kappa$ B (S536), total NF- $\kappa$ B, in TCHP knock-down and control cells treated with BAY or vehicle. *Below panel*: quantification (one-way ANOVA; \*\* $P$  = 0.0014 vs. control DMSO; # $P$  = 0.0293 vs. shTCHP DMSO).
- E p62 expression in TCHP knock-down and control cells treated with BAY or vehicle (one-way ANOVA; \*\* $P$  = 0.0004 vs. control DMSO; # $P$  = 0.0243 vs. shTCHP DMSO).
- F p62 expression in TCHP knock-down and control cells treated with siRELA or control (one-way ANOVA; \*\* $P$  = 0.0023 vs. control siRNA; # $P$  = 0.0127 vs. shTCHP siRELA).
- G ChIP-qPCR analysis confirms the of NF- $\kappa$ B p65 enrichment to I $\kappa$ B $\alpha$  and p62 promoter in TCHP knock-down cells (unpaired  $t$ -test; \*\* $P$  = 0.0057 and \*\* $P$  = 0.0037 vs. control, respectively).

Data information: Statistical analyses were performed on at least three independent experiments. Data are represented as mean  $\pm$  SD.

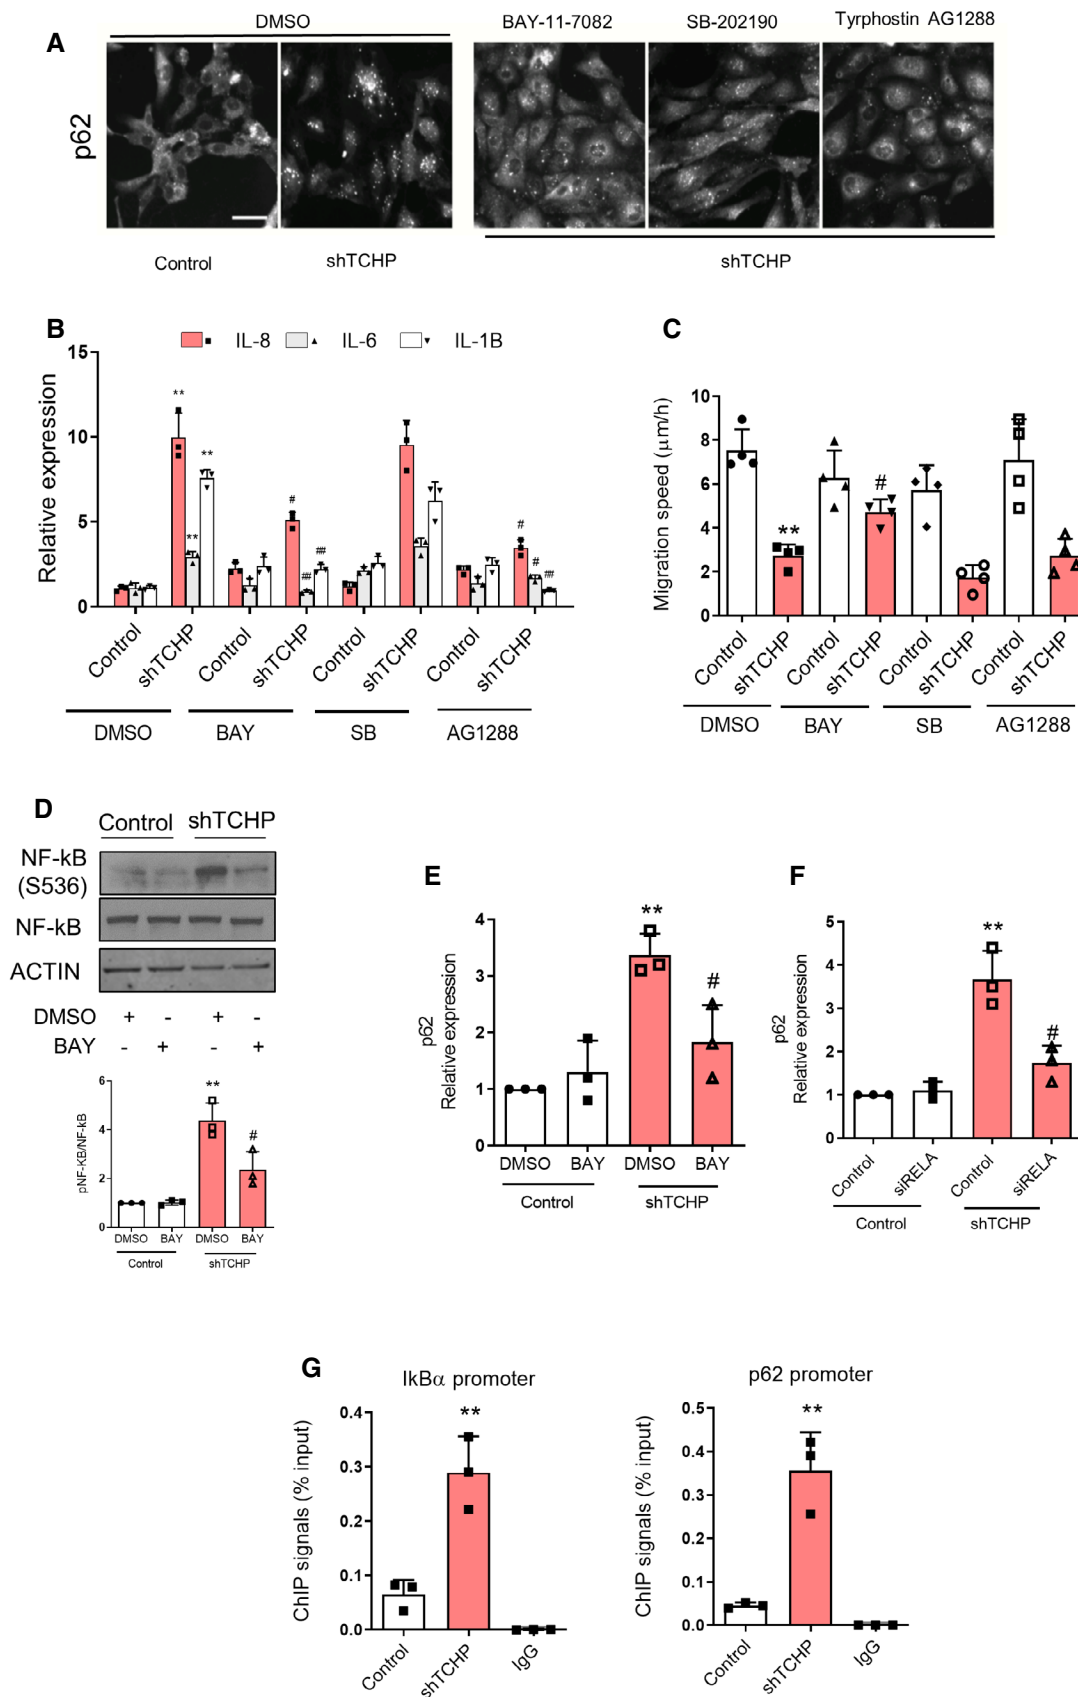

Figure EV5.
